# Supplementary material for: Weak evidence of country- and institution-related status bias in the peer review of abstracts
Source: eLife journal article supplement (doi:10.7554/elife.64561), 2021-03-18
Supplement: supp [file elife_poa_e64561_Figure_1_figure_supplement_5.docx]

Figure 1–figure supplement 5
