# Supplementary figures and images for: Weak evidence of country- and institution-related status bias in the peer review of abstracts
Source: eLife journal article supplement (doi:10.7554/elife.64561), 2021-03-18

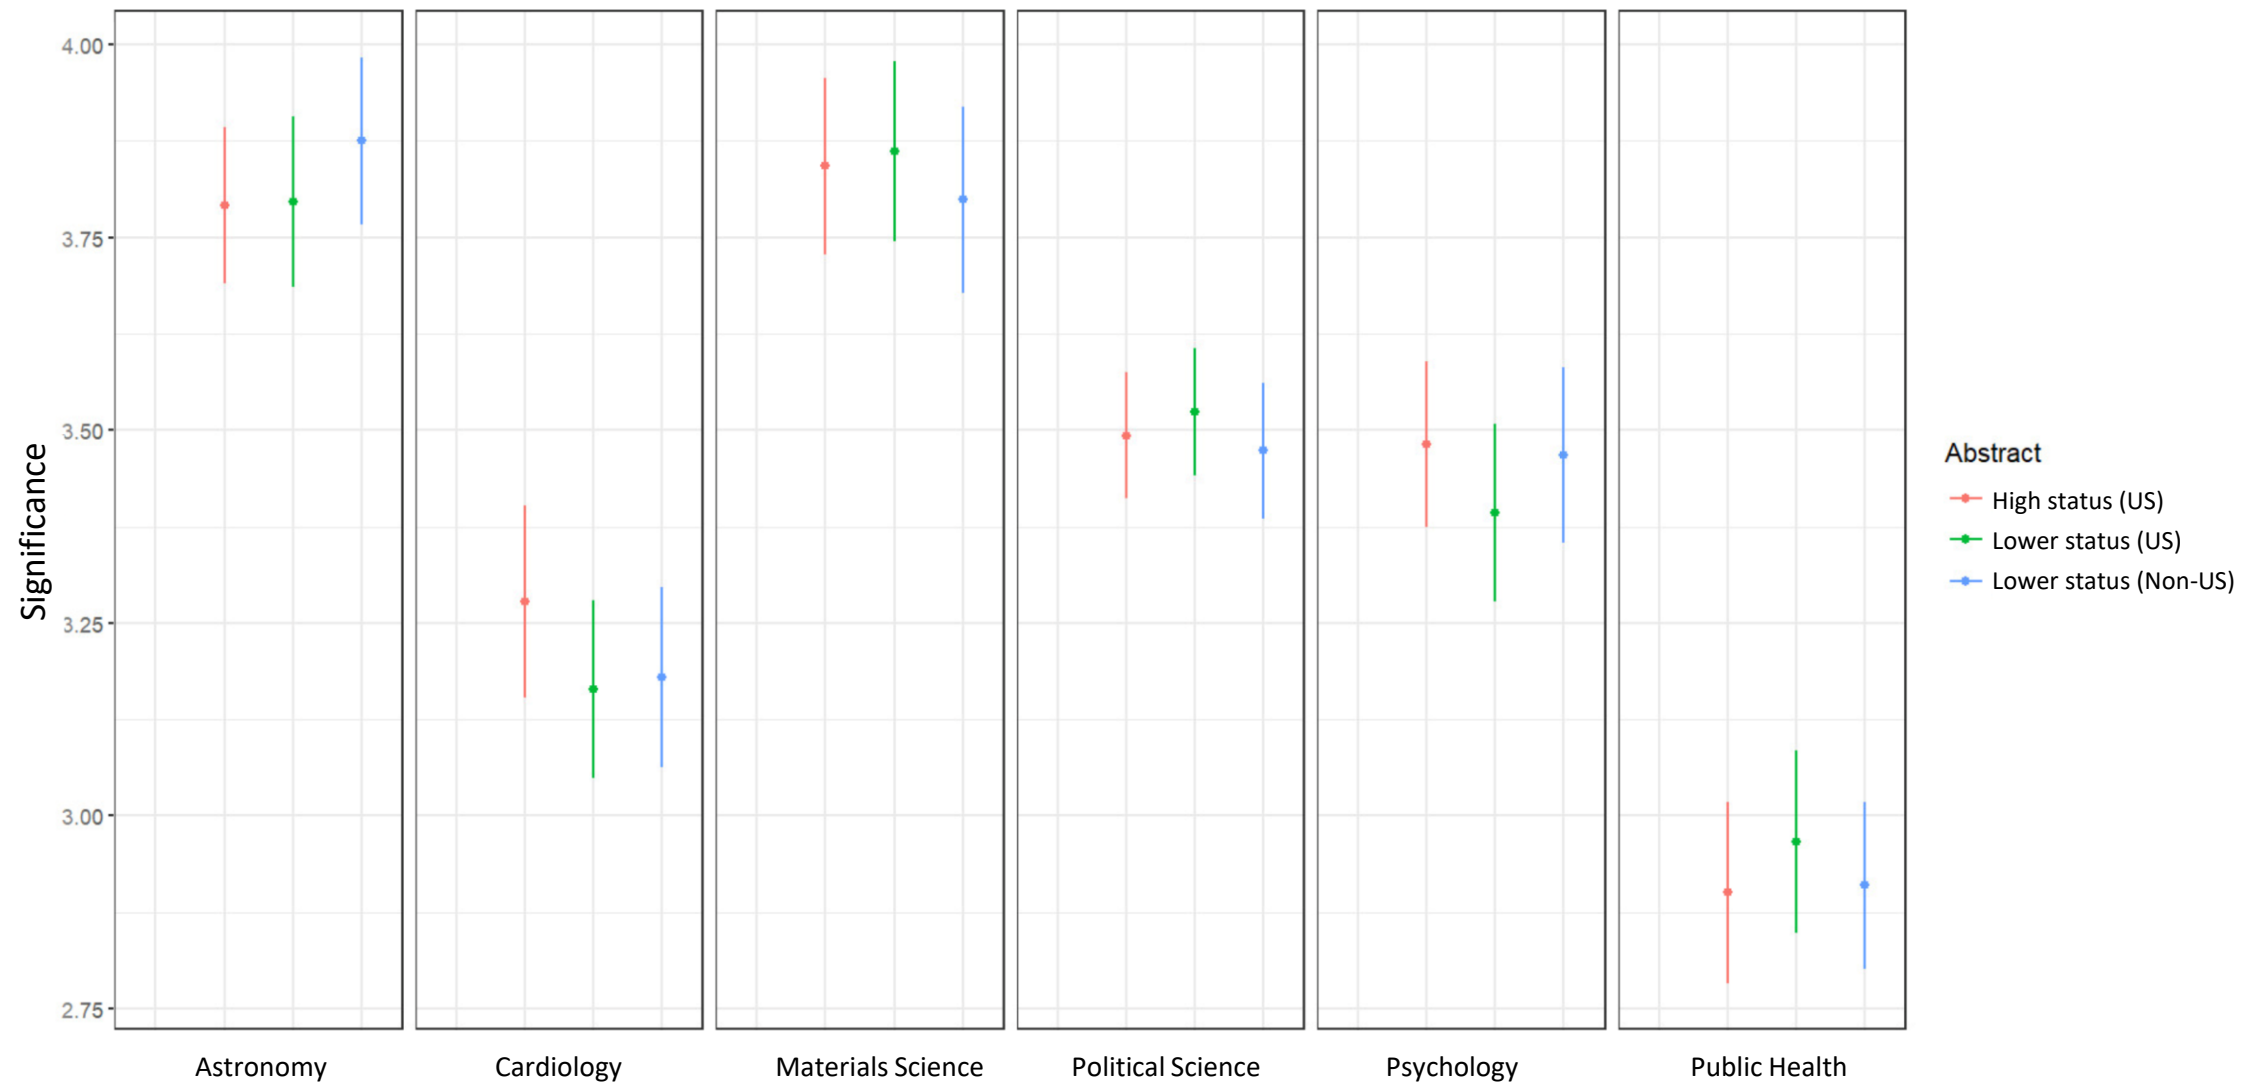

Supplement: supp [file elife-64561-supp-v1.zip]

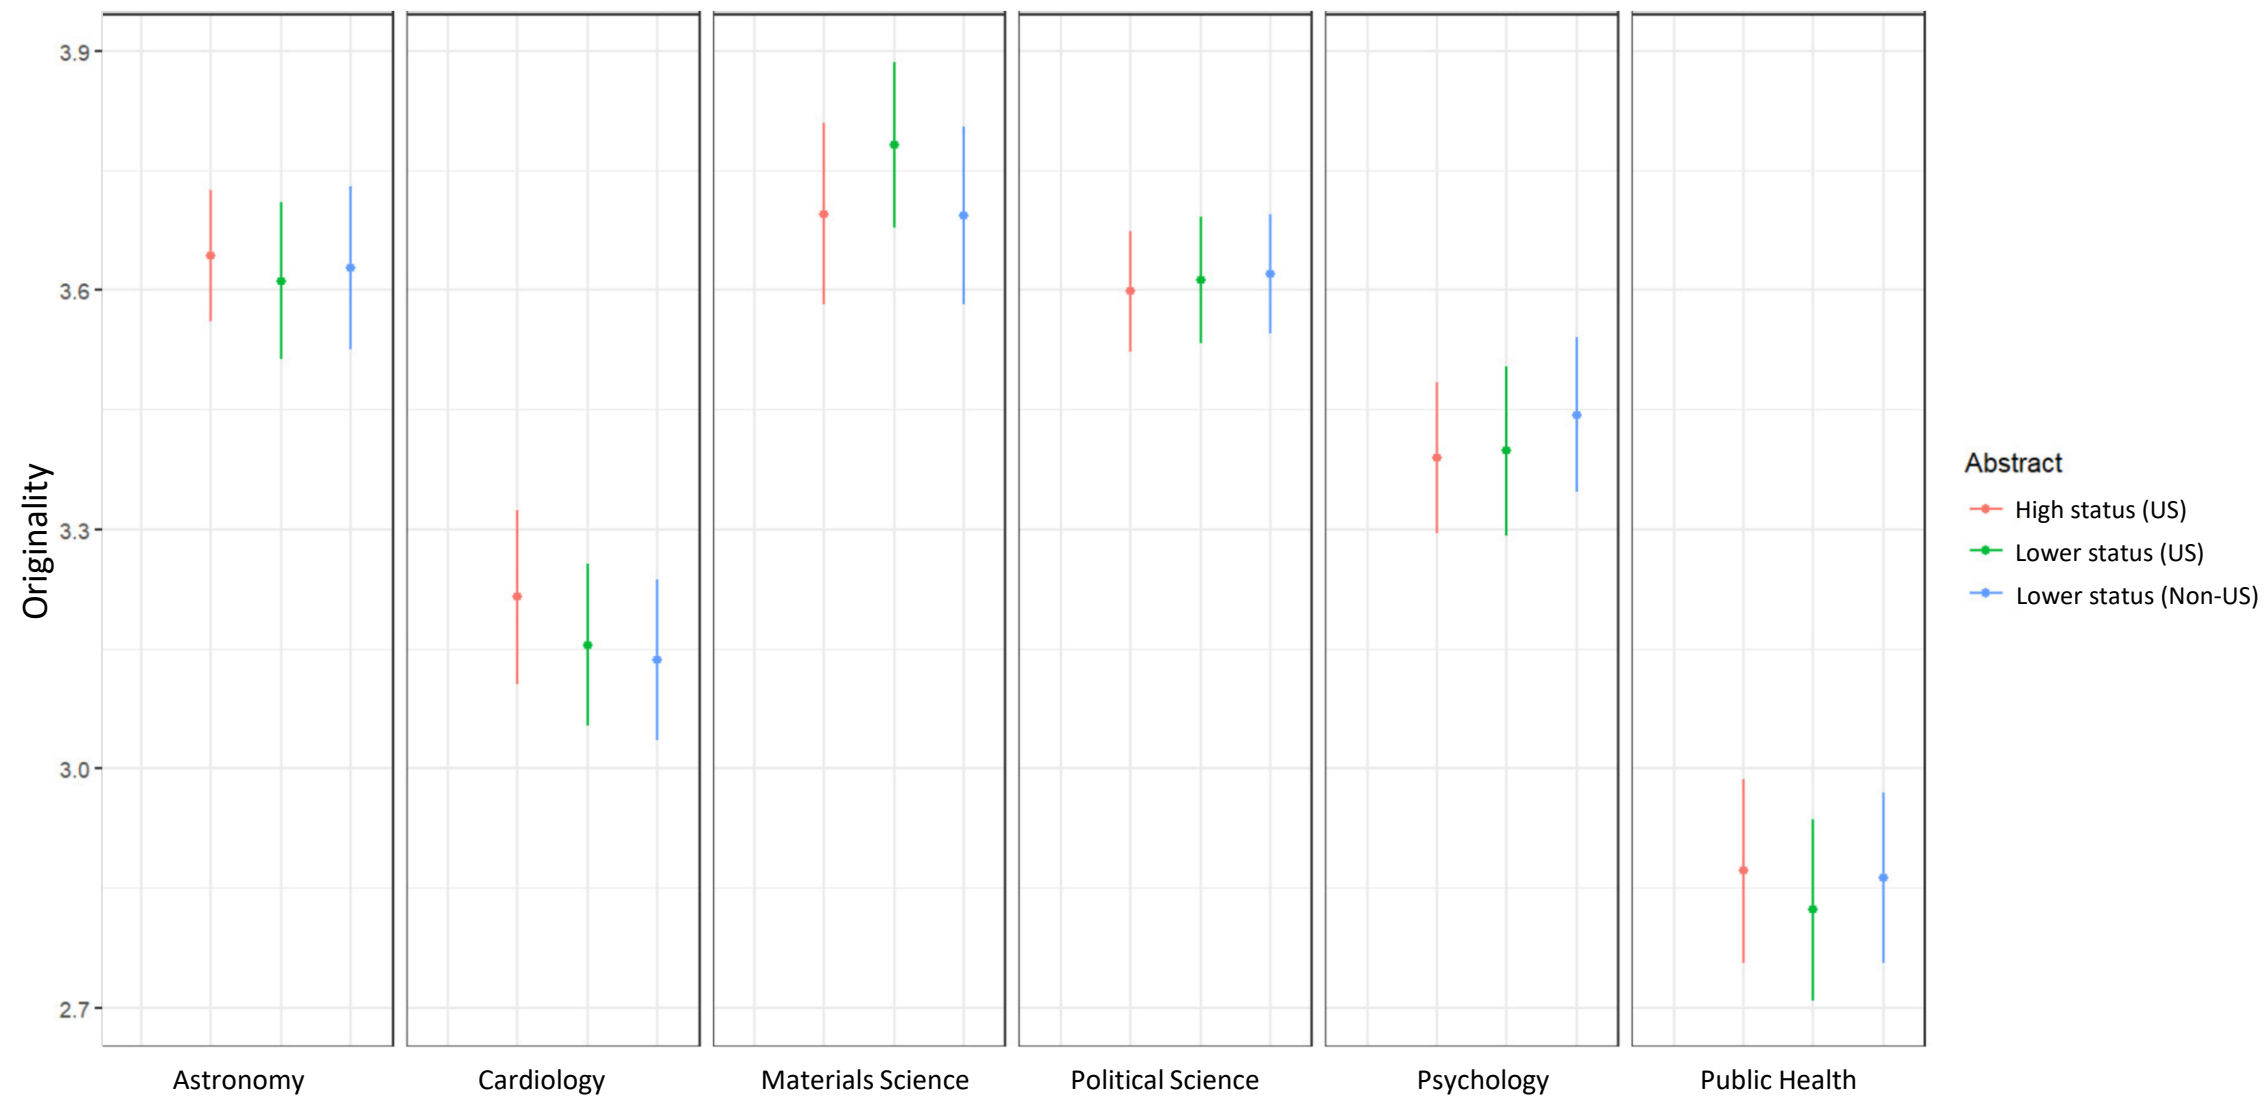

Supplement: supp [file elife-64561-supp-v1.zip]

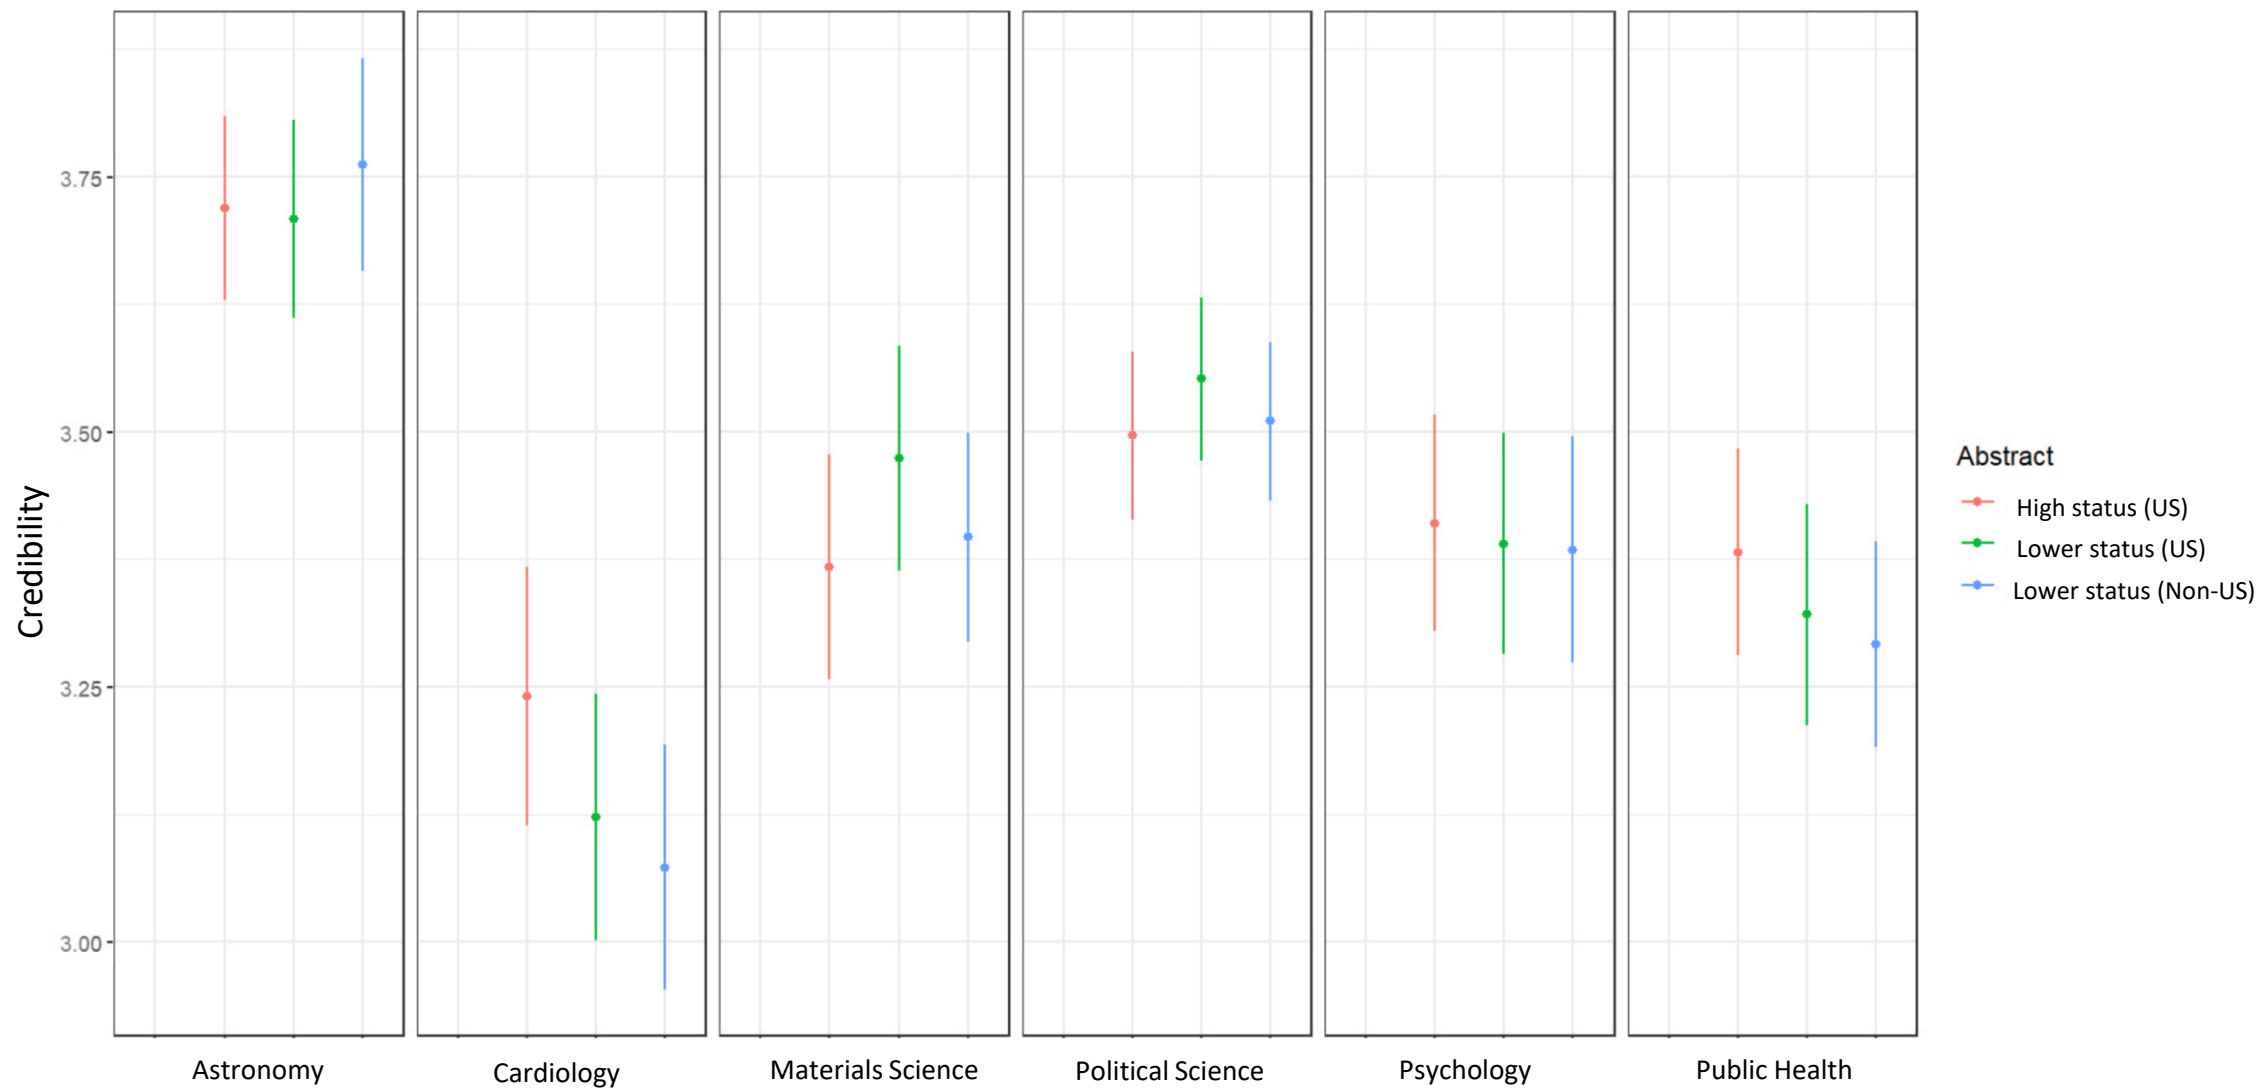

Supplement: supp [file elife-64561-supp-v1.zip]

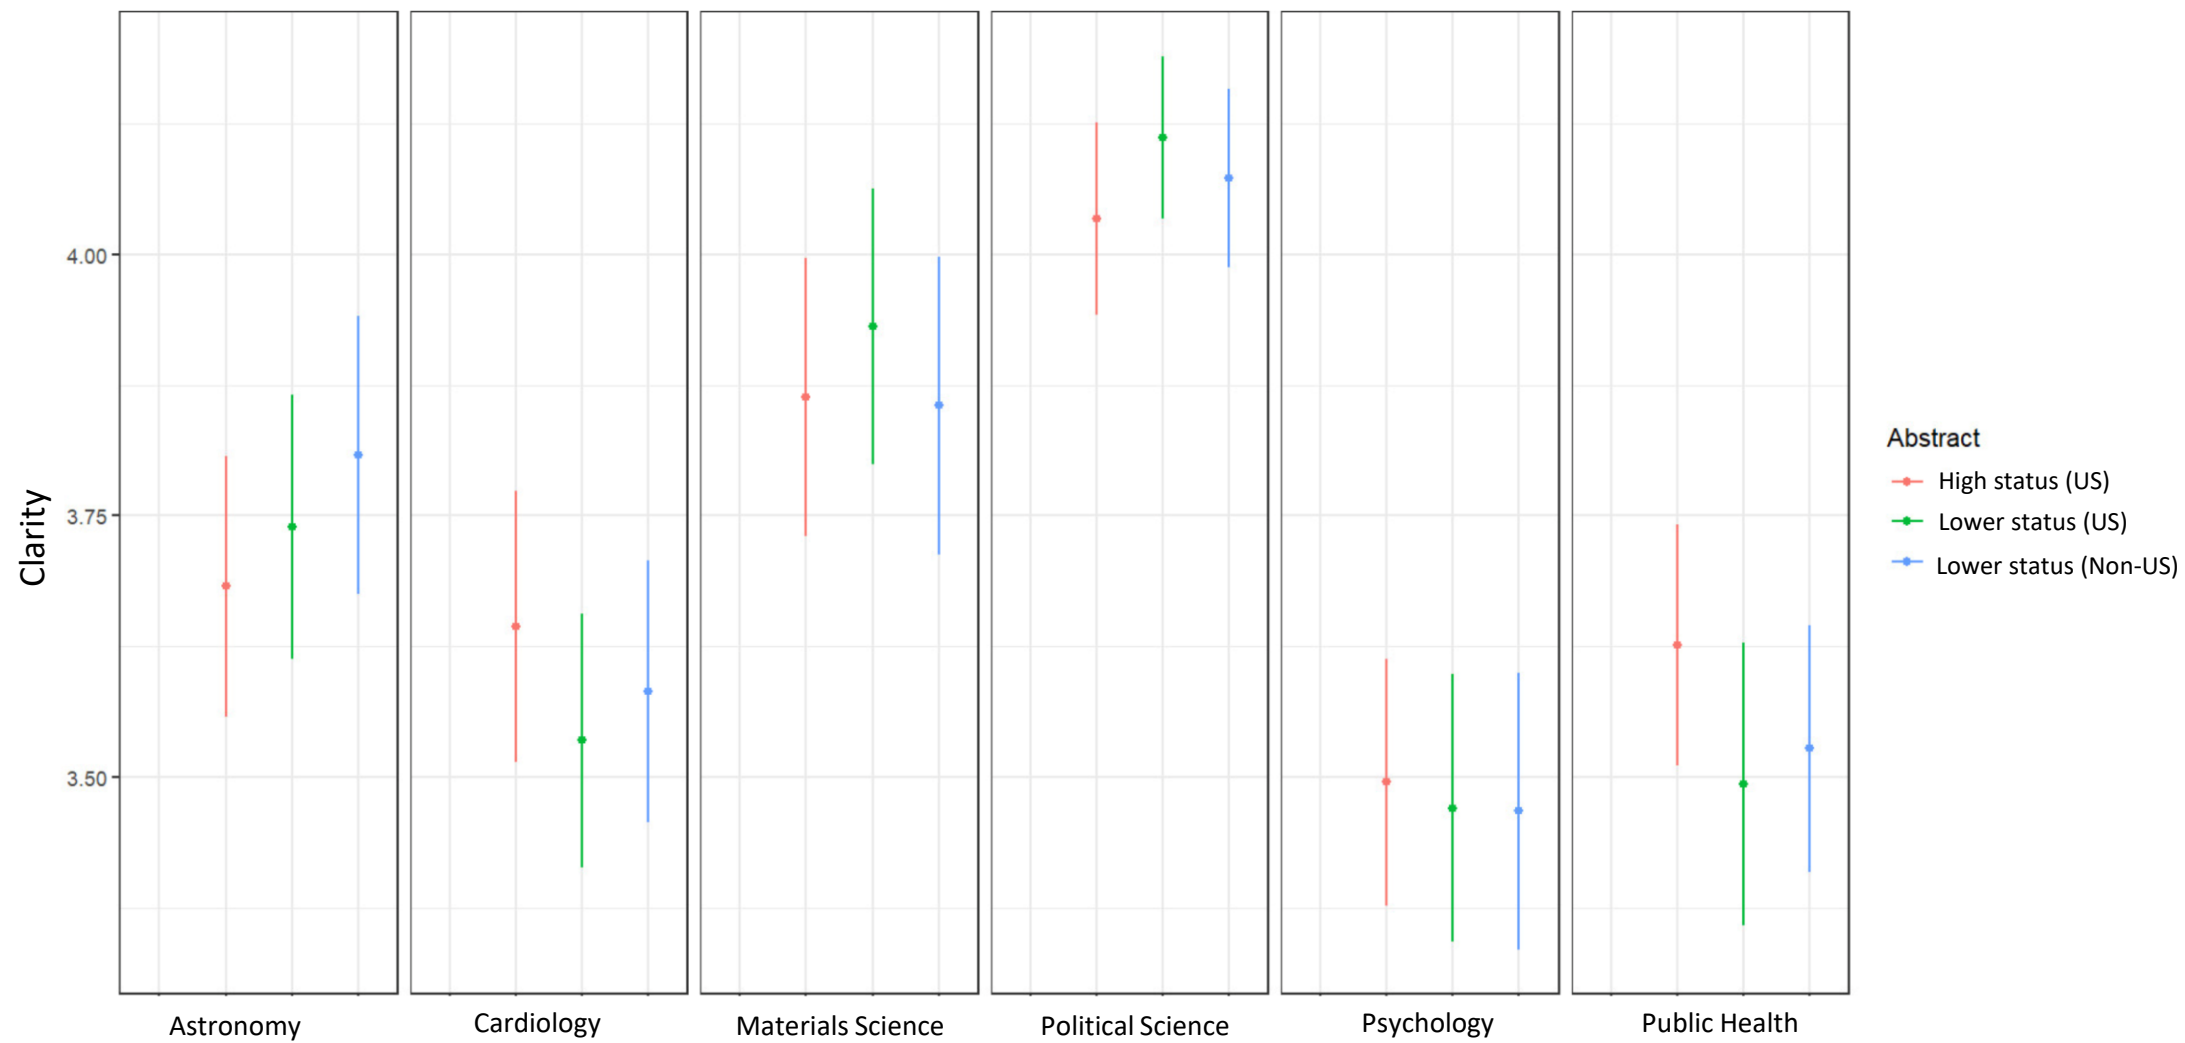

Supplement: supp [file elife-64561-supp-v1.zip]
